# Supplementary material for: Jellyfish Stings and Their Management: A Review
Source: Mar Drugs. 2013 Feb 22;11(2):523–50. doi: 10.3390/md11020523 (PMC3640396; doi:10.3390/md11020523)
Supplement: Supplementary File 1 — Supplementary Information (PDF, 126 KB) [file marinedrugs-11-00523-s001.pdf]

## Supplementary Information

**Table S1.** Main jellyfish species, geographical distribution/habitat and effects of venom.

| Species and Size                                                        | Geographic Distribution                                | Local Symptoms                                                                                                                | Systemic Symptoms                                                                                               | Deadly |
|-------------------------------------------------------------------------|--------------------------------------------------------|-------------------------------------------------------------------------------------------------------------------------------|-----------------------------------------------------------------------------------------------------------------|--------|
| <i>P. physalis</i><br>Float: 2–30 cm high<br>Tentacles: 10–30 m         | worldwide;<br>more common in tropical waters           | acute pain, wheals $\geq 7$ cm, skin necrosis after 24 h (++)                                                                 | muscular spasms, abdominal pain, arrhythmias, headache                                                          | Yes    |
| <i>P. utriculus</i><br>Float: 2–10 cm high<br>Single tentacle: 2–3 m    | tropical Indo-Pacific Ocean, Australia, South-Atlantic | local pain, wheals (++)                                                                                                       | Very rare or none                                                                                               | No     |
| <i>C. fleckeri</i><br>Bell: (30 $\times$ 20) cm<br>Tentacles: 3–60 m    | Indo-Pacific region and Australia                      | pain, massive wheals, vesicles for 10 days, scarring (+++)                                                                    | severe hypotension, arrhythmias, cardiac failure, pulmonary hypertension                                        | Yes    |
| <i>C. quadrigatus</i><br>Bell: (10 $\times$ 8) cm<br>Tentacles: 5–30 cm | Australia, Indo-Pacific region                         | pain, wheals, swelling for 24 h (++)                                                                                          | asystole, bradycardia, hypotension, pulmonary hypertension/oedema                                               | Yes    |
| <i>C. quadrumanus</i><br>Bell: (14 $\times$ 10) cm<br>Tentacles: 3–4 m  | North West Atlantic, Caribbean and Brazil              | pain, wheals (for 24 h); scarring and dyschromia for 2 months (++)                                                            | hypotension, acute cardiac failure, pulmonary hypertension/oedema                                               | Yes    |
| <i>C. barnesi</i><br>Bell: (2.5 $\times$ 2) cm<br>Tentacles: 5–35 cm    | Australia                                              | oval erythema 5 $\times$ 7 cm with surrounding papules (++)                                                                   | Irukandji syndrome (back pain, severe hypertension, agitation, muscle cramps, headache, nausea/vomit, sweating) | Yes    |
| <i>Morbakka</i><br>Bell: (11 $\times$ 5) cm<br>Tentacles: 10 cm         | Australia                                              | 10 mm wide wheals, intense pain, itching, vesicles, skin necrosis (++)                                                        | Irukandji syndrome (muscle spasms, back pain, anxiety, respiratory distress, hypotension, sweating)             | No     |
| <i>C. rastoni</i><br>Bell: (5 $\times$ 2) cm<br>Tentacles: 5–30 cm      | Australia                                              | delayed and moderate pain, wheals (3–12 mm width), swelling, blisters (rare), pigmentary changes for 2 weeks after sting (++) | No                                                                                                              | No     |
| <i>C. alata</i><br>Bell: (9 $\times$ 5) cm<br>Tentacles: 30–40 cm       | tropical and sub-tropical Pacific waters, Hawaii       | pain, wheals, blisters, dyschromia for 2 weeks (++)                                                                           | mild Irukandji syndrome, possible allergic reactions                                                            | No     |

Table S1. Cont.

|                         |                                                                                              |                                                              |                                                                   |     |
|-------------------------|----------------------------------------------------------------------------------------------|--------------------------------------------------------------|-------------------------------------------------------------------|-----|
| <i>Tamoya haplonema</i> | Atlantic ocean                                                                               | burning pain (for about 2 h), wheals, blisters/scarring (++) | muscle cramps, nausea, vomiting, restlessness, sweating, headache | No  |
| Bell: (10 × 5) cm       | (tropical/sub-tropical waters)                                                               |                                                              |                                                                   |     |
| Tentacles: 3 cm         | worldwide, tropical and cold waters (common in Mediterranean, North Atlantic, North Pacific) | instant severe pain, wheals, possible hyperpigmentation (++) | (rare) allergic reaction and respiratory distress                 | No  |
| <i>P. noctiluca</i>     |                                                                                              |                                                              |                                                                   |     |
| Bell: (10 × 3) cm       |                                                                                              |                                                              |                                                                   |     |
| Tentacles: 10 m         |                                                                                              |                                                              |                                                                   |     |
| <i>C. quinquecirrha</i> | Australia, Atlantic, Pacific, Indian ocean                                                   | intense pain ,wheals/rash for days (+/++)                    | (rare) allergic reaction and respiratory distress                 | Yes |
| Bell Φ: 6 cm            |                                                                                              |                                                              |                                                                   |     |
| Tentacles: 50 cm        |                                                                                              |                                                              |                                                                   |     |
| <i>C. capillata</i>     | worldwide; more common in North Sea, North Atlantic, Arctic Sea, North Pacific               | pain, wheals; erythema may persist for days (++)             | (possible) muscle cramps, sweating, nausea, allergic reaction     | No  |
| Bell Φ: ≥1 m            |                                                                                              |                                                              |                                                                   |     |
| Tentacles: 30–50 cm     |                                                                                              |                                                              |                                                                   |     |

Φ = diameter of the jellyfish bell/umbrella. Intensity of local symptoms: + = mild; ++ = moderate; +++ = severe.

Table S2. Guidelines for the management of jellyfish stings: Treatments and level of scientific evidence.

| Treatments        | Chirodropids       |                       | Carybdeids      |                   | Physalia           | True Jellyfish          |                     |                     |
|-------------------|--------------------|-----------------------|-----------------|-------------------|--------------------|-------------------------|---------------------|---------------------|
|                   | <i>C. fleckeri</i> | <i>C. quadrumanus</i> | <i>C. alata</i> | <i>C. barnesi</i> | <i>P. physalis</i> | <i>C. quinquecirrha</i> | <i>P. noctiluca</i> | <i>C. capillata</i> |
| Sea water rinsing | A(4)               | A(4,2), B(4)          | A(1)            |                   | A(1)               | B(4), F(2)              | A(4)                | A(4)                |
| Hot water/packs   | A,B(4)             |                       | A(1,3)          | A(4)              | A(1,4)             | F(4)                    |                     |                     |
| Tentacles removal | B(4)               | B(4)                  | B(4)            | B(4)              | B(4)               | B(4)                    | B(4)                | B(4)                |
| Topic Vinegar     | A,B(1), C(4)       | A,B(4)                | C(4)            | C(4), F(4)        | A(1), B(4), C(4)   | C(4), D(4,2)            | C(4)                | C(4)                |
| Ice packs         | A(1)               | C(4), D(2)            | C(4)            |                   | A(1,4), F(1)       | F(4)                    |                     |                     |
| Fresh water       | C(4)               | C(4), F(2)            | A(1), C(4)      |                   | C(4)               | C(4), F(2)              |                     |                     |
| BaCl <sub>2</sub> |                    |                       |                 |                   | B(4)               |                         | B(4)                |                     |
| MgCl <sub>2</sub> |                    |                       |                 |                   | B(4)               |                         | B(4)                |                     |
| NaOH              | C(4)               |                       |                 |                   | C(4)               |                         |                     |                     |
| NaCl              |                    |                       |                 |                   |                    |                         | C(4)                |                     |
| NaClO             | C(4)               |                       |                 |                   | C(4)               | C(4)                    |                     |                     |

Table S2. Cont.

|                            |              |            |             |             |                  |              |              |
|----------------------------|--------------|------------|-------------|-------------|------------------|--------------|--------------|
| Choline-Cl                 |              |            |             |             |                  | B(4)         | C(4)         |
| MgCl <sub>2</sub> solution |              |            |             |             | C(4)             | C(4)         |              |
| Urea                       |              | C(4)       |             |             |                  | B(4)         |              |
| Stingose §                 | A,B(1,4)     |            | A(1), C(4)  |             | A(1), B(4), F(4) | B(4)         |              |
| Acetone                    |              |            |             |             |                  | C(4)         |              |
| Bromelain 10%              |              | C(4), F(2) |             |             | C(4), F(2)       | C(4), F(2)   | C(4)         |
| Papain                     |              |            | A(1)        |             | A(1,4)           | A(4), B(4)   |              |
| Baking soda slurr †        |              |            |             |             | C(4)             | A(4)         | A(4)         |
| Methlated spirits          | C(4)         |            | C(4)        |             | A(1), C(4)       | C(4)         | A,B(4)       |
| Ammonia                    |              | C(4), D(2) | A,B(4)      |             |                  | C(4), D(4,2) | C(4), D(4,2) |
| Ethanol                    | A,E(4), C(4) | C(4), D(2) |             |             |                  | C(4), A(2)   | C(4), A(2)   |
| Topic lidocaine            |              | A(2), B(4) |             |             | A,B(4)           | A(4,2), B(4) | A(4,2), B(4) |
| Opiates i.v.               | A(4)         | A(4)       | A(4)        | A(4)        | A(4)             |              |              |
| MgSO <sub>4</sub> ® i.v.   | E(4)         |            |             | A(4), E(4)  |                  |              |              |
| Resepirine i.v.            |              |            |             |             | E(4)             |              |              |
| Phentolamn i.v.            |              |            |             | E(4)        |                  |              |              |
| Glyceryl trinitrate *      |              |            |             | E(4)        |                  |              |              |
| Anti-histamine i.v.        |              |            |             |             | E(4)             | E(4)         | E(4)         |
| Ascorbate (i.v./oral)      | A(4) @       | A(4) @     | A(4) @      | A(4) @      | A(4) @           | A(4) @       | A(4) @       |
| Anti-venom                 | A,E(1)       | E(4) ♥     | Ineffective | Ineffective | Ineffective      | Ineffective  | Ineffective  |
| PIB                        | C(4), E(4)   | C(4), E(4) | C(4), E(4)  |             | C(4), E(4)       | C(4)         | C(4), E(4)   |

Table S2. Cont.

| Legend                                                   |                                                                                                              |
|----------------------------------------------------------|--------------------------------------------------------------------------------------------------------------|
| A = pain relief                                          | 1 to 4 = level of scientific evidence according to the Agency for Healthcare Research and Quality [2002]     |
| B = block of venom discharge                             | 1 = randomized controlled trials                                                                             |
| C = increase of venom discharge                          | 2 = experimental paired/crossover study                                                                      |
| D = pain exacerbation                                    | 3 = observational studies with controls; case series                                                         |
| E = systemic benefits                                    | 4 = studies without controls, studies based on physiology and basic science, case reports and expert opinion |
| F = ineffective                                          | @ = one single case report on an unspecified jellyfish species                                               |
| ® Magnesium sulfate                                      |                                                                                                              |
| § 20% $\text{Al}_2(\text{SO}_4)_3$                       |                                                                                                              |
| † $\text{NaHCO}_3$                                       |                                                                                                              |
| * = sublingual                                           |                                                                                                              |
| ♥ = tested on <i>Q. quadrigatus</i> (a similar cubozoan) |                                                                                                              |
| PIB = Pressure Immobilization Bandage                    |                                                                                                              |
